# Supplementary material for: European real-world data about the use of a new delivery system containing a preservative-free multi-dose glaucoma treatment
Source: PubMed Central journal article supplement — Eur J Ophthalmol. 2020 May 6;31(3):1056–63. doi: 10.1177/1120672120919342 (PMC8358534; doi:10.1177/1120672120919342), 2020-05-06
Supplement: sj-pdf-1-ejo-10.1177_1120672120919342.pdf [file sj-pdf-1-ejo-10.1177_1120672120919342.pdf]

|                                                                                               |           |                   |
|-----------------------------------------------------------------------------------------------|-----------|-------------------|
| <b>Mean IOP values from 28 days up to 6 months</b> (based on the duration of use of the MDDS) | N (eyes)  | <b>1539</b>       |
|                                                                                               | Mean (SD) | <b>16.4 (3.8)</b> |
| <b>IOP with at least 3 months of use of the delivery system</b>                               | n         | <b>721</b>        |
|                                                                                               | Mean (SD) | <b>16.1 (4.0)</b> |
| <b>IOP with at least 6 months of use of the delivery system</b>                               | n         | <b>368</b>        |
|                                                                                               | Mean (SD) | <b>16.2 (3.3)</b> |
